# Supplementary material for: BIM Management Framework Based on ISO and DMBoK2 for Scalable Data Governance
Source: Research Square preprint supplement (doi:10.21203/rs.3.rs-7479740/v1), 2025-11-14
Supplement: Supplementary file 1 [file 4f5942ab5c03fbd4c15c7a02.docx]

Graphical Abstract

**Title:** Introducing the ISO-DMBoK2 BIM Management Framework (IDBMF): Bridging ISO 19650 and DMBoK2 for Scalable BIM Data Governance

**Highlights**

- Proposes the ISO-DMBoK2 BIM Management Framework (IDBMF) to strengthen structured BIM data governance.
- Integrates ISO 19650 workflows with DMBoK2 governance principles in a four-phase model.
- Validates the framework through real-world BIM project implementation.
- Enhances documentation accuracy, security enforcement, and system interoperability.
- Provides a scalable foundation for digital transformation in construction.

**Graphical Abstract:** This figure illustrates the development and validation of the ISO-DMBoK2 BIM Management Framework (IDBMF), which integrates ISO 19650 and DMBoK2 to enhance structured data governance in BIM environments. The four-phase model demonstrates key improvements in documentation accuracy, security mechanisms, interoperability, and scalability through real-world application.

**Figure.** The ISO-DMBoK2 BIM Management Framework (IDBMF) and its four-phase structure.

Aim: This study introduces an integrated BIM governance framework (IDBMF) by combining ISO 19650 and DMBoK2 to address critical gaps in scalability, security, and interoperability.

Design & Methodology: IDBMF follows a four-phase structure aligned with ISO 19650 and DMBoK2, validated through a case study involving a four-story reinforced concrete apartment project. Performance metrics were used to assess documentation, coordination, and security outcomes.

Originality: This is the first structured BIM framework to unify ISO 19650 protocols with DMBoK2 governance standards in a scalable and regulation-aware model.

Findings: The framework improves documentation accuracy by 28%, reduces coordination errors by 77%, and enhances security enforcement by 92%.

Conclusion: IDBMF offers a scalable, standards-driven approach to BIM governance, supporting long-term digital transformation and regulatory alignment in construction projects.

Declaration of Ethical Standards: The author(s) declare that the materials and methods used in this study do not require ethical committee approval and/or legal-special permission.
